# Supplementary material
Source: publisher site journal article supplement (http://kjim.org/upload/media/kjim-2020-135-suppl1.pdf)
Supplement: Supplementary file 1 [file kjim-2020-135-suppl1.pdf]

**Supplementary Table 1. Baseline characteristics of study patients according to treatment at discharge and during follow-up**

| Variable                                                        | Vasodilating $\beta$ -blockers<br>(n = 3,608) | Conventional<br>$\beta$ -blockers (n = 3,661) | p value | Standardized<br>difference |
|-----------------------------------------------------------------|-----------------------------------------------|-----------------------------------------------|---------|----------------------------|
| <b>Demographics</b>                                             |                                               |                                               |         |                            |
| Age, yr                                                         | 62.3 $\pm$ 12.4                               | 63.2 $\pm$ 12.4                               | 0.002   | 7.8                        |
| Male sex                                                        | 2,779 (77.0)                                  | 2,740 (74.8)                                  | 0.030   | 8.6                        |
| <b>Coronary risk factors</b>                                    |                                               |                                               |         |                            |
| Diabetes mellitus                                               | 689 (19.1)                                    | 855 (23.4)                                    | < 0.001 | 11.3                       |
| Hypertension                                                    | 1,804 (50.0)                                  | 1,909 (52.1)                                  | 0.067   | 6.0                        |
| Dyslipidemia                                                    | 291 (8.1)                                     | 305 (8.3)                                     | 0.680   | 0.4                        |
| Current or ex-smoking                                           | 2,212 (62.8)                                  | 2,176 (60.7)                                  | 0.012   | 6.0                        |
| Chronic kidney disease                                          | 546 (15.1)                                    | 634 (17.3)                                    | 0.011   | 7.3                        |
| <b>Previous medical history</b>                                 |                                               |                                               |         |                            |
| History of MI                                                   | 140 (3.9)                                     | 148 (4.0)                                     | 0.723   | 0.8                        |
| History of Angina                                               | 184 (5.1)                                     | 181 (4.9)                                     | 0.761   | 0.1                        |
| History of heart failure                                        | 30 (0.8)                                      | 22 (0.6)                                      | 0.241   | 1.6                        |
| History of CVA                                                  | 153 (4.2)                                     | 176 (4.8)                                     | 0.240   | 3.8                        |
| <b>Clinical characteristics at presentation and in-hospital</b> |                                               |                                               |         |                            |
| Killip class $\geq$ III on admission                            | 329 (9.1)                                     | 437 (11.9)                                    | < 0.001 | 9.8                        |
| STEMI                                                           | 2,004 (55.5)                                  | 1,859 (50.8)                                  | < 0.001 | 9.4                        |
| Left ventricular ejection fraction                              | 51.5 $\pm$ 10.5                               | 52.5 $\pm$ 10.5                               | < 0.001 | 9.7                        |
| <b>Medication at discharge</b>                                  |                                               |                                               |         |                            |
| Aspirin                                                         | 3,603 (99.9)                                  | 3,659 (99.9)                                  | 0.249   | 1.6                        |
| Clopidogrel                                                     | 2,470 (68.5)                                  | 2,548 (69.6)                                  | 0.293   | 2.5                        |
| Prasugrel                                                       | 331 (9.2)                                     | 474 (12.9)                                    | < 0.001 | 12.1                       |
| Ticagrelor                                                      | 781 (21.6)                                    | 626 (17.1)                                    | < 0.001 | 11.5                       |
| RAS blockade                                                    | 3,020 (83.7)                                  | 3,285 (89.7)                                  | < 0.001 | 16.7                       |
| Statins                                                         | 3,485 (96.6)                                  | 3,477 (95.0)                                  | 0.001   | 9.1                        |
| <b>Angiographic and procedural characteristics</b>              |                                               |                                               |         |                            |
| Glycoprotein IIb/IIIa inhibitor                                 | 527 (14.6)                                    | 535 (14.6)                                    | 0.993   | 0.7                        |
| Intracoronary imaging device                                    | 799 (22.1)                                    | 750 (20.5)                                    | 0.084   | 5.2                        |
| LM or LAD infarct-related artery                                | 1,831 (50.7)                                  | 1,814 (49.5)                                  | 0.307   | 2.1                        |
| ACC/AHA B2/C lesion                                             | 3,612 (87.6)                                  | 3,171 (86.6)                                  | 0.193   | 2.4                        |
| Pre-procedural TIMI flow grade 0–1                              | 2,083 (57.7)                                  | 2,093 (57.2)                                  | 0.628   | 2.4                        |
| Post-procedural TIMI flow grade 3                               | 3,516 (97.5)                                  | 3,577 (97.7)                                  | 0.479   | 2.5                        |
| Stent diameter, mm                                              | 3.13 $\pm$ 0.43                               | 3.15 $\pm$ 0.44                               | 0.165   | 3.6                        |
| Total stent length, mm                                          | 29.4 $\pm$ 13.9                               | 30.0 $\pm$ 14.6                               | 0.086   | 3.5                        |
| Multi-vessel coronary artery disease                            | 1,900 (52.7)                                  | 1,831 (50.0)                                  | 0.024   | 5.9                        |
| Cardiogenic shock                                               | 173 (4.8)                                     | 226 (6.2)                                     | 0.010   | 6.1                        |
| Mechanical circulatory support                                  | 82 (2.3)                                      | 71 (1.9)                                      | 0.322   | 1.1                        |

Values are presented as mean  $\pm$  SD or number (%).

MI, myocardial infarction; CVA, cerebrovascular accident; STEMI, ST segment elevation myocardial infarction; RAS, renin-angiotensin system; LM, left main; LAD, left anterior descending; ACC/AHA, American College of Cardiology/American Heart Association; TIMI, thrombolysis in myocardial infarction.
